# Supplementary material
Source: Springer Nature journal article supplement (https://www.springermedizin.de/resource/supplementary/12889_2013_6637_MOESM4_ESM.pdf/9498598)

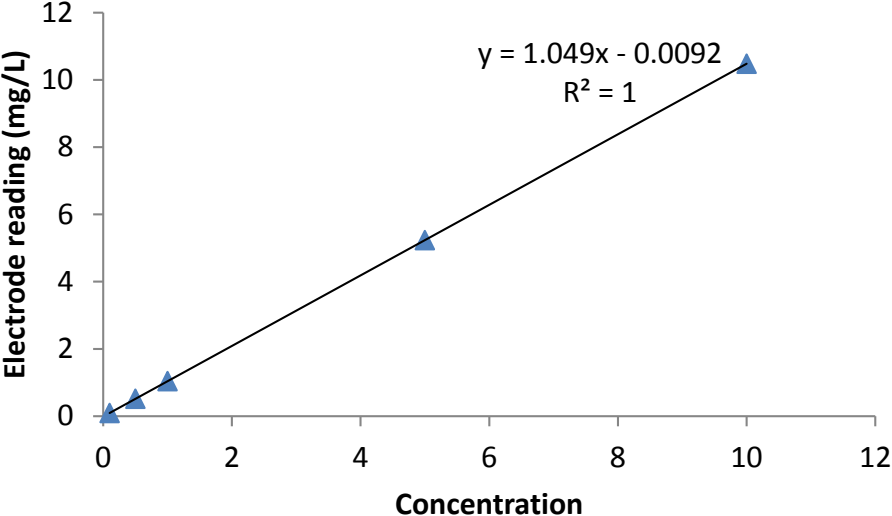

Supplement: MOESM4 [file 9498598]
